# Supplementary material for: Sudden cold temperature delays plant carbon transport and shifts allocation from growth to respiratory demand
Source: Copernicus journal article supplement (doi:10.5194/bg-11-1425-2014), 2014-03-14
Supplement: Supplementary file 1 [file bg-11-1425-2014-supplement.pdf]

## SUPPLEMENT

### Natural abundance labelling

The experiment described in the main article is based on a preliminary study, which used natural abundance isotopic variations of  $\delta^{13}\text{CO}_2$  in air ( $\delta^{13}\text{C}_{\text{AIR}}$ ) to assess the effect of a sudden decrease in air temperature on C transport from above- to belowground in rye-grass.

In the preliminary experiment, the continuous introduction of fresh air into the growth cabinets was suppressed over the entire growing period resulting in a  $^{13}\text{C}$  enrichment of cabinet  $\text{CO}_2$  due to the highly productive plants growing within them, discriminating against  $^{13}\text{C}$ . High photosynthetic rates changed cabinet air conditions to *c.* 100 ppm [ $\text{CO}_2$ ] and  $\delta^{13}\text{C}_{\text{air}}$  to *c.* -1‰ which subsequently also changed  $\delta^{13}\text{C}$  values of respiration. Labelling was achieved by re-starting fresh air supply resulting in near-ambient air conditions inside the cabinets with [ $\text{CO}_2$ ] of 400 ppm and  $\delta^{13}\text{C}_{\text{air}}$  of *c.* -9‰.

Fresh air supply started at the same time as the random allocation of plants to one of two cabinets – one with a warm treatment (25°C; equal to the daytime growing conditions; control) and one with a cold treatment (10°C). However, we found that the  $\delta^{13}\text{C}$  signal of shoot respiration was very sensitive to changes in  $\delta^{13}\text{C}_{\text{AIR}}$ , impeding the interpretation of the results. In order to overcome the sensitivity of the  $\delta^{13}\text{C}$  signal of shoot respiration to small changes in  $\delta^{13}\text{C}_{\text{AIR}}$ , we followed up on those initial results using a  $^{13}\text{C}$  pulse-labelling approach which is described in the main article.

### Results

The  $\delta^{13}\text{C}$  of pre-label leaf-respired  $\text{CO}_2$  was around -11‰ which is much less depleted than usual  $\text{C}_3$  plant respiration (of around -27‰). Further,  $\delta^{13}\text{C}_{\text{SR}}$  was stable during the diurnal cycle of the pre-label day (data not shown) with only small variations between replicates. However,  $\delta^{13}\text{C}_{\text{SR}}$  was very responsive to the labelling. Immediately after introducing ambient fresh air, shoot respiration was already much more depleted in  $^{13}\text{C}$  (change of *c.* 3.5‰) compared to the average values during pre-labelling (Fig S1, upper panel). Such short-term high sensitivity of  $\delta^{13}\text{C}_{\text{SR}}$  indicates a very fast utilization of recent photo-assimilates for shoot respiration and demonstrates that  $\delta^{13}\text{C}_{\text{SR}}$  is not suitable to assess, for instance, water-use efficiency at the whole-season field scale, as originally proposed by Barbour *et al.* (2011)<sup>i</sup>.

Within about 7 h,  $\delta^{13}\text{C}_{\text{SR}}$  had changed by the full magnitude of the treatment (*c.* 8‰). There was no difference in the response of  $\delta^{13}\text{C}_{\text{SR}}$  between warm and cold treatments. However, after 8 h post-labelling,  $\delta^{13}\text{C}_{\text{SR}}$  of the warm treatment increased again by *c.* 3‰, whereas the cold treatment continued to decline, levelling out at 10.5 h post-labelling. The change of  $\delta^{13}\text{C}_{\text{SR}}$  by the full magnitude of the label indicates that the pool of recent photo-assimilates in leaves is quickly turned over.

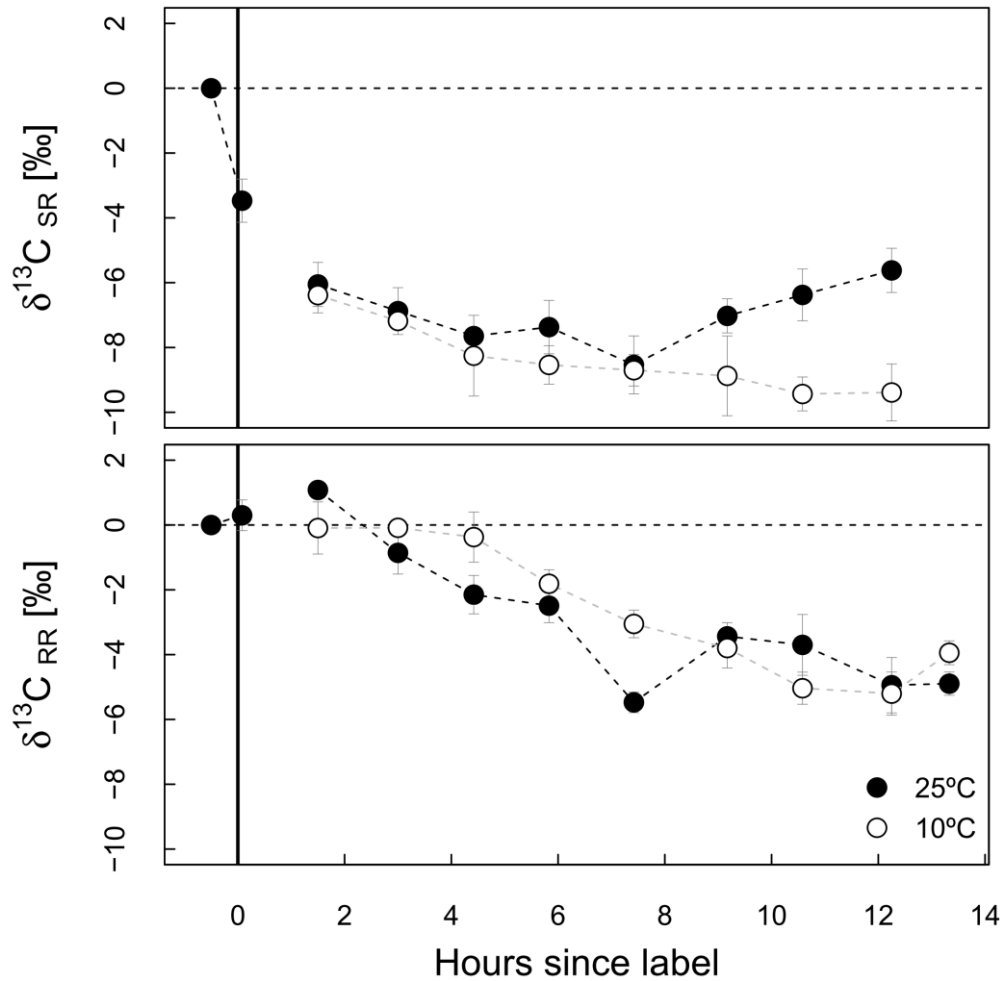

Figure S1: Time course of relative change of  $\delta^{13}\text{C}$  in shoot ( $\delta^{13}\text{C}_{\text{SR}}$ ; *upper panel*) and root ( $\delta^{13}\text{C}_{\text{RR}}$ ; *lower panel*) respired  $\text{CO}_2$  during continuous label; control treatment (25 °C, *closed symbols*); cold treatment (10 °C; *open symbols*); sample allocation to warm and cold cabinets and label start (*vertical line*). The data shown are means  $\pm$  standard error ( $n = 3$ )

The  $\delta^{13}\text{C}$  signal of root respiration ( $\delta^{13}\text{C}_{\text{RR}}$ ) on the other hand, showed a time-lagged response to the label application with a faster response in the warm (after *c.* 2 h) compared to the cold

treatment (after *c.* 5 h; Fig S1, lower panel). Unlike  $\delta^{13}\text{C}_{\text{SR}}$ ,  $\delta^{13}\text{C}_{\text{RR}}$  of both treatments did not change by the full magnitude of the label, shifting only by 5‰.

## Dark incubation time

Selection of the dark incubation time was based on diurnal measurements, which showed that  $\delta^{13}\text{C}_{\text{SR}}$  is highly variable after initial placement in the dark, but is stable after 2 h (Fig S2), which was consistent with Barbour et al. (2011)<sup>1</sup>.

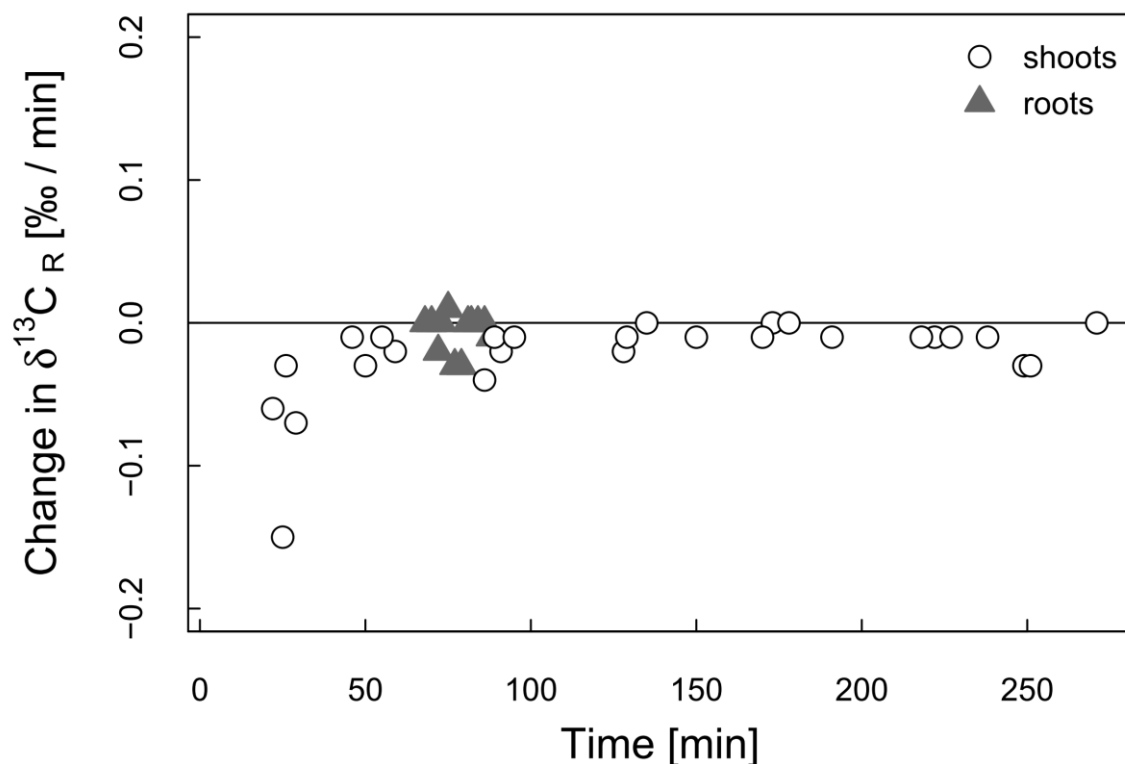

Figure S2: Rate of change of  $\delta^{13}\text{C}$  in respiration of shoots and roots ( $\delta^{13}\text{C}_R$ ) after harvest.  $\delta^{13}\text{C}_{\text{SR}}$  is highly variable after initial placement in the dark, but is stable after 2 - 2.5 hours. Based on these results, shoot samples were left in the dark for 2 hours, before being incubated (in  $\text{CO}_2$ -free air, also in the dark) for approximately 20 minutes, prior to measurement of  $\delta^{13}\text{C}_{\text{SR}}$ . Roots were measured approximately 1 h after harvesting, and showed little variation in  $\delta^{13}\text{C}_{\text{RR}}$  around this time. Note, nearly all values fall within the  $1\sigma$  standard deviation of the instrument's target calibration standard (0.12‰).

<sup>1</sup> Barbour, M.M., Tcherkez, G., Bickford, C., Mauve, C., Lamothe, M., Sinton, S., and Brown, H.:  $\delta^{13}\text{C}$  of leaf-respired  $\text{CO}_2$  reflects intrinsic water-use efficiency in barley. *Plant Cell Environ.*, 34, 792-799, 2011.
